# Supplementary material for: Solvothermal synthesis of magnetic copper nitride nanocubes with highly electrocatalytic reduction properties
Source: Royal Society of Chemistry journal article supplement (doi:10.1039/c4ra01307g), 2014-01-01
Supplement: c4ra01307g1.pdf [file c4ra01307g1.pdf]

## Electronic Supporting Information

# Solvothermal Synthesis of Magnetic Copper Nitride Nanocubes with Highly Electrocatalytic Reduction Properties

**Pinxian Xi,<sup>ab</sup> Zhihong Xu,<sup>a</sup> Daqiang Gao,<sup>c</sup> Fengjuan Chen,<sup>b</sup> Desheng Xue,<sup>c</sup>  
Chun-Lan Tao,<sup>\*d</sup> and Zhong-Ning Chen<sup>\*a</sup>**

*<sup>a</sup>State Key Laboratory of Structural Chemistry, Fujian Institute of Research on the Structure of Matter, Chinese Academy of Sciences, Fuzhou, Fujian 350002, China*

*E-mail: czn@fjirsm.ac.cn. (Z. N. Chen).*

*<sup>b</sup>Key Laboratory of Nonferrous Metal Chemistry and Resources Utilization of Gansu Province, State Key Laboratory of Applied Organic Chemistry and Colleague of Chemistry and Chemical Engineering, Lanzhou University, Lanzhou, 730000, P. R. China.*

*Fax: +86 931 8912582; Tel: +86 931 8912589*

*<sup>c</sup>Key Laboratory for Magnetism and Magnetic Materials of MOE, Lanzhou University, Lanzhou, 730000, P. R. China.*

*<sup>d</sup>School of Physical Science and Technology, Lanzhou University, Lanzhou 730000, P. R. China.*

## Experimental Details

### Chemicals

All the reagents used in this work, including  $\text{Cu}(\text{NO}_3)_2 \cdot 3\text{H}_2\text{O}$ , ODA, ethanol, and cyclohexane were of analytical grade from the Beijing Chemical Factory of China and were used without further purification.

### Characterization

The powder XRD patterns were recorded with a Bruker D8-advance X-ray powder diffractometer with  $\text{CuK}_\alpha$  radiation ( $\lambda = 1.5406 \text{ \AA}$ ). The specimen was prepared as follows. A small amount of product was dispersed in cyclohexane. Then, we dripped one drop of the resulting suspension onto a glass substrate. After it was dried at room temperature in air, we continued to drip another one until the final product fully covered the substrate. The  $2\theta$  range used in the measurement was from 10 to 80 in steps of 0.02 with a count time of 1 s. Transmission electron microscopy (TEM) images were recorded on Tecnai G2 F30 Field Emission Transmission Electron Microscope. The specimen was prepared as follows. A small amount of product was dispersed in cyclohexane. One drop of the resulting suspension was transferred onto a standard holey carbon-covered copper (or molybdenum) microgrid and dried at room temperature in air. X-ray photoelectron spectroscopy (XPS) measurements were carried out on a PHI-5702 multi-functional spectrometer using  $\text{Al K}_\alpha$  radiation.

### Synthesis of $\text{Cu}_3\text{N}$ nanocubes

100 mg of  $\text{Cu}(\text{NO}_3)_2 \cdot 6\text{H}_2\text{O}$  was added into 2.5 g of 1-octadecylamine (ODA) and 2 mL of oleylamine (OAm). The above mixture solution was degassed at 110 °C for 1 h under a flow of nitrogen, and under a blanket of nitrogen, quickly heated to 240 °C, and then kept at this temperature for 20 min. The black-brown mixture was cooled to room temperature. Ethanol (40 mL) was added to the mixture and the precipitate was collected by centrifugation at 8000 rpm. Finally, the product was redispersed in hexane.

### Electrochemistry.

A glassy carbon (GC) disk electrode (3.0 mm diameter) was first polished with alumina slurries (0.05m) and then cleaned by sonication in 0.1 M  $\text{HNO}_3$ ,  $\text{H}_2\text{SO}_4$  and nano pure water successively for 10 min. The  $\text{Cu}_3\text{N}$  nanocubes dissolved in  $\text{CHCl}_3$  were then dropcasted onto the clean GC electrode surface by a microliter syringe (the resulting electrodes were denoted as  $\text{Cu}_3\text{N} / \text{GC}$ ). The particle films were dried by a gentle nitrogen stream for 2 min. Voltammetric

measurements were carried out with a CHI 660D electrochemical workstation. The  $\text{Cu}_3\text{N} / \text{GC}$  prepared above was used as working electrode. A saturated calomel electrode (SCE) reference electrode (in 3 M NaCl, aq.) and a Pt coil were used as the reference and counter electrodes, respectively. All electrode potentials in the present study were referred to the SCE reference electrode. Oxygen reductions were examined by first bubbling the electrolyte solution with ultrahigh purity oxygen for at least 15 min and then lanketing the solution with an oxygen atmosphere during the entire experimental procedure.

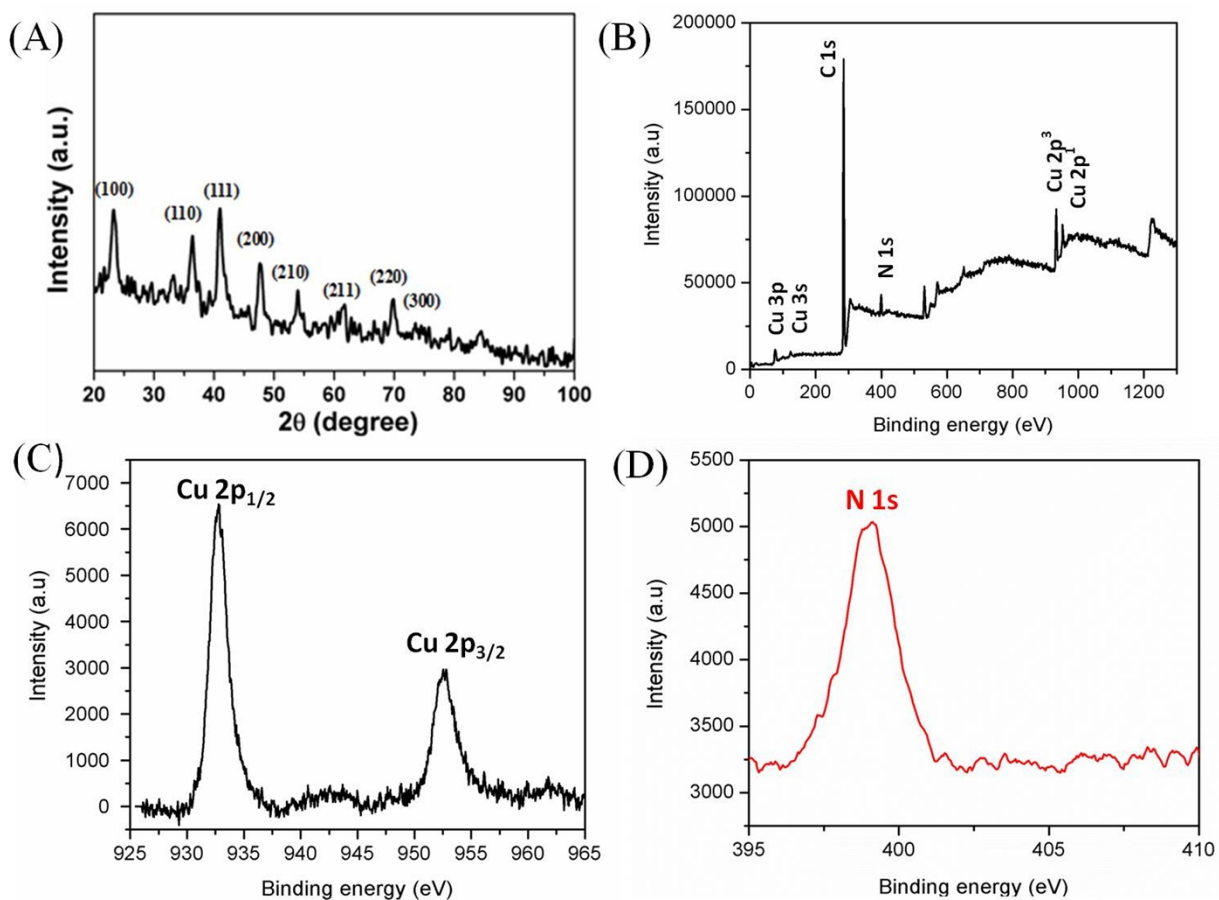

**Fig. S1.** (A) XRD pattern of  $\text{Cu}_3\text{N}$  nanocubes. (B) Survey spectrum of XPS pattern of  $\text{Cu}_3\text{N}$  nanocubes. (C) The Cu 2p spectrum of Cu (I). (D) The N 1s XPS spectrum.

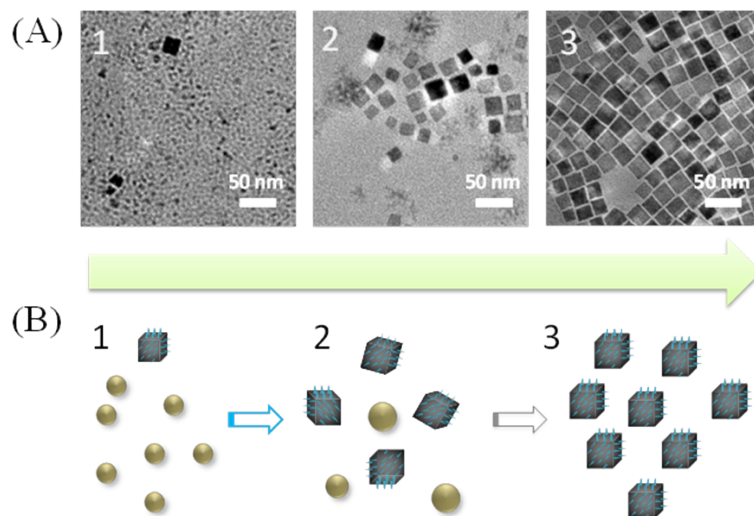

**Fig. S2.** (A) TEM of the  $\text{Cu}_3\text{N}$  at 240 °C with 2, 5 and 10 min. (B) The proposed growth procedure of  $\text{Cu}_3\text{N}$  nanocubes.

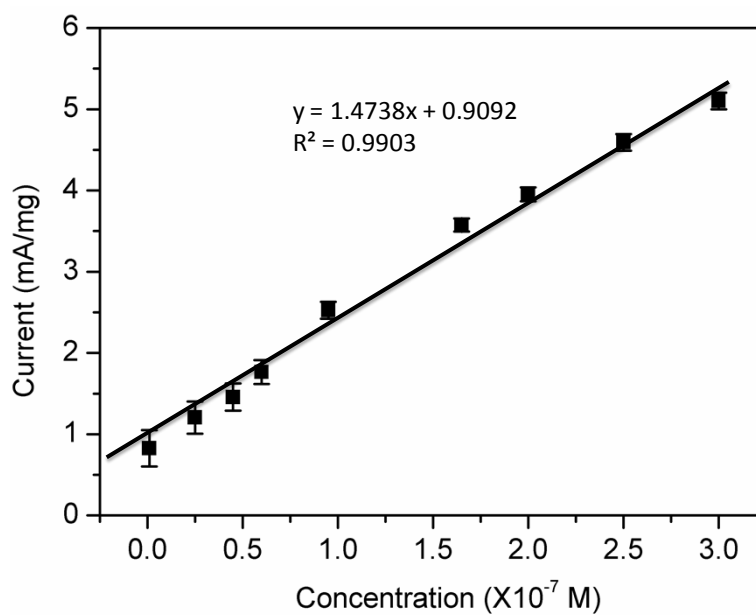

**Fig. S3.** The Linear relationship between peak current and NB concentrations.
